# Supplementary material for: Prognostic factors for histiocytic and dendritic cell neoplasms
Source: Oncotarget. 2017 Oct 19;8(58):98723–32. doi: 10.18632/oncotarget.21920 (PMC5716762; doi:10.18632/oncotarget.21920)
Supplement: Supplementary file 1 [file oncotarget-08-98723-s001.pdf]

## Prognostic factors for histiocytic and dendritic cell neoplasms

### SUPPLEMENTARY MATERIALS

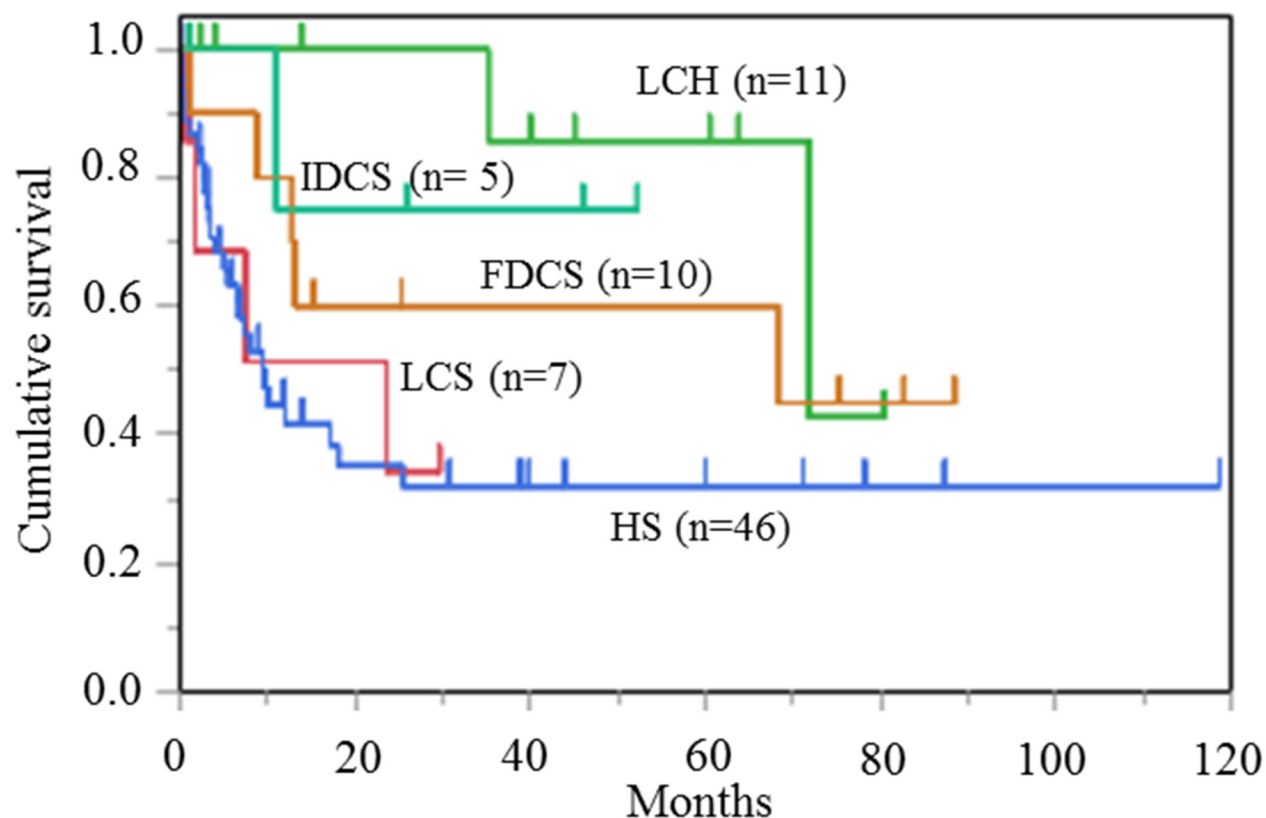

|      |    |    |   |   |   |   |
|------|----|----|---|---|---|---|
| HS   | 46 | 11 | 6 | 5 | 3 | 2 |
| LCS  | 7  | 3  | 0 | 0 | 0 | 0 |
| LCH  | 11 | 7  | 5 | 3 | 0 | 0 |
| FDCS | 10 | 5  | 4 | 4 | 2 | 0 |
| IDCS | 5  | 3  | 2 | 0 | 0 | 0 |

**Supplementary Figure 1: Overall survival for each subtype: histiocytic sarcoma (HS), Langerhans cell histiocytosis (LCH), Langerhans cell sarcoma (LCS), follicular dendritic cell sarcoma (FDCS), and interdigitating cell sarcoma (IDCS).** The 2-year OS rates were 34.3% for HS, 100% for LCH, 35.2% for LCS, 60.0% for FDCS, and 75.0% for IDCS.

Supplementary Table 1: Comparison between our study and previous reports of Histiocytic sarcoma

|                                 | Our study N = 50 | Previous reports* N = 58 |
|---------------------------------|------------------|--------------------------|
| Age: median [range]             | 68 [21-88]       | 56 [0.5-89]              |
| Sex: Male/Female                | 1/1              | 1.4/1                    |
| <b>Clinical presentation</b>    |                  |                          |
| Nodal lesion only               | 31.8% (14/44)    | 11.8% (4/34)             |
| Extranodal lesion only          | 27.3% (12/44)    | 44.1% (15/34)            |
| Nodal and extranodal lesion     | 40.9% (18/44)    | 44.1% (15/34)            |
| <b>Laboratory data</b>          |                  |                          |
| Albumin $\leq$ 3.5 g/dl         | 52.5% (21/40)    | NA                       |
| Elevated LDH level              | 54.5% (24/44)    | NA                       |
| Elevated CRP level              | 55.3% (21/38)    | NA                       |
| <b>Clinical status</b>          |                  |                          |
| ECOG performance status 2-4     | 42.2% (19/45)    | NA                       |
| B symptoms                      | 31.1% (14/45)    | 50.0% (6/12)             |
| Ann Arbor Stage III-IV          | 68.9% (31/45)    | 47.8% (22/46)            |
| <b>Therapy</b>                  |                  |                          |
| Chemotherapy                    | 18               | 23                       |
| Radiation therapy               | 4                | 4                        |
| Curative operation              | 8                | 13                       |
| Chemotherapy+ radiation therapy | 4                | 3                        |
| Chemotherapy+ operation         | 1                | 2                        |
| Radiation therapy+ operation    | 0                | 0                        |
| No therapy                      | 11               | 4                        |
| Follow up periods (months)      | 7 (0.1-119)      | 26 (0.1-221)             |
| Dead due to disease             | 58.7% (27/46)    | 45.2% (19/42)            |

\*Previous reports: *Cancers (Basel)* 2014; 6: 2275-95 (Ref. 4); *Mod Pathol* 2005; 18: 693-704 (Ref 6); *Histopathology* 2002; 41: 1-29 (Ref 19); *Am J Surg Pathol* 2004; 28: 1133-44 (Ref 20), and *Eur J Cancer* 2015; 51: 2413-22 (Ref 21).

LDH, Lactate dehydrogenase; CRP, C-reactive protein; NA, Not available

Supplementary Table 2: Primer sets used for sequencing analyses for BRAF mutation in our study

| Primer                         | Sequence (5'-3')               |
|--------------------------------|--------------------------------|
| BRAF-Forward- first step PCR   | CATAATGCTTGCTCTGATAGGAAAATGAG  |
| BRAF Reverse- first step PCR   | AACTCAGCCAGCATCTCAGGGCCAA      |
| BRAF-Forward - second step PCR | CCTTTACTTACTACACCTCAGATATATTC  |
| BRAF Reverse- second step PCR  | GGAAAAATAGCCTCAATTCTTACCATCCAC |
